# Supplementary material for: Water-mediated decarboxylative radical nitrosation of β-keto acids with tert-butyl nitrite: access to α-oximino ketones
Source: Royal Society of Chemistry journal article supplement (doi:10.1039/d2nj04175h), 2022-01-01

# Water-Mediated Decarboxylative Radical Nitrosation of $\beta$ -Keto Acids with *tert*-Butyl Nitrite: Access to $\alpha$ -Oximino Ketones

Lina Jia, \*,<sup>a, b</sup> Linlin Li<sup>a</sup>, Fuzhong Han \*,<sup>a, b</sup> and Xiangping Hu \*,<sup>c</sup>

<sup>a</sup>*College of Chemistry and Chemical Engineering, Qiqihar University, Qiqihar 161006, China.*

<sup>b</sup>*Heilongjiang Provincial Key Laboratory of Catalytic Synthesis for Fine Chemicals, Qiqihar 161006, China*

<sup>c</sup>*Dalian Institute of Chemical Physics, Chinese Academy of Sciences, Dalian 116023, China.*

*E-mail: jialinachn@163.com*

## Supporting Information

# NMR Spectra

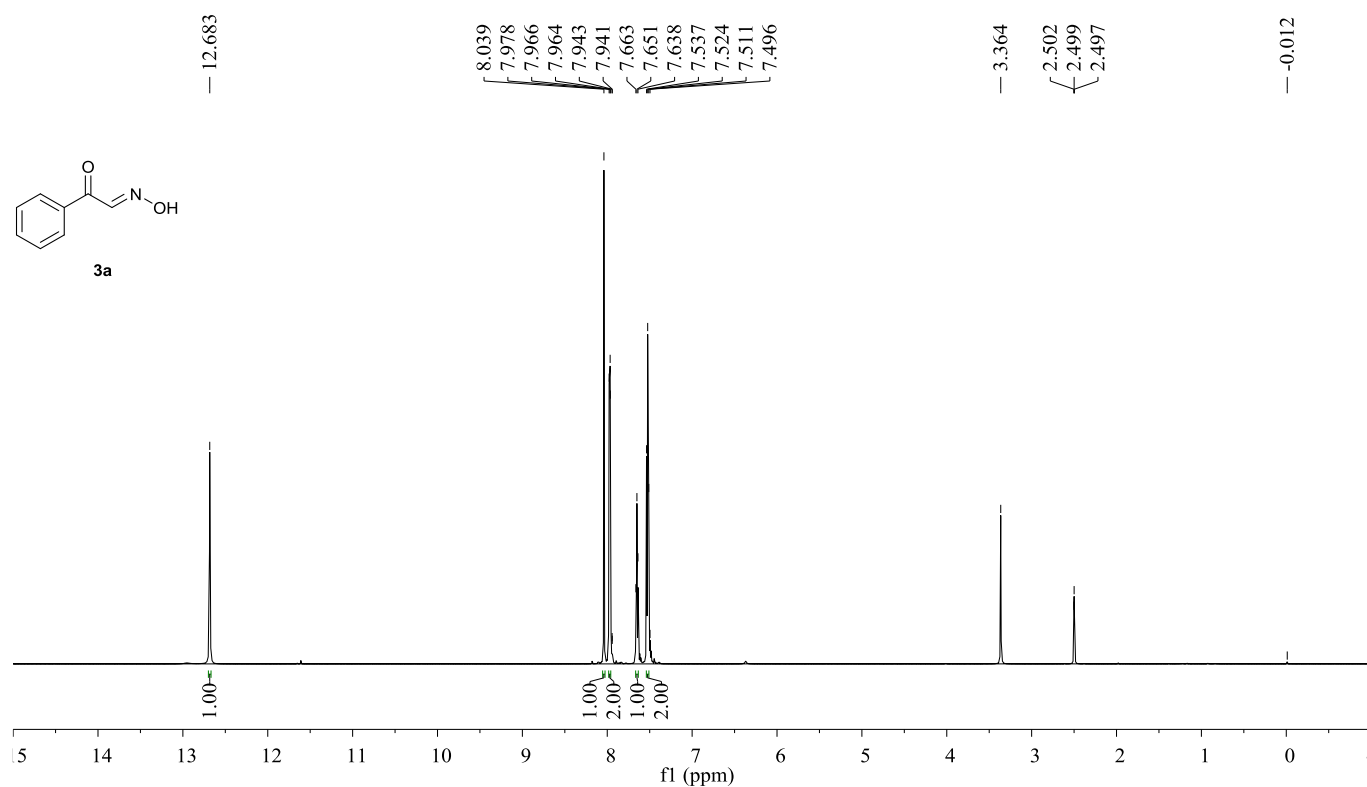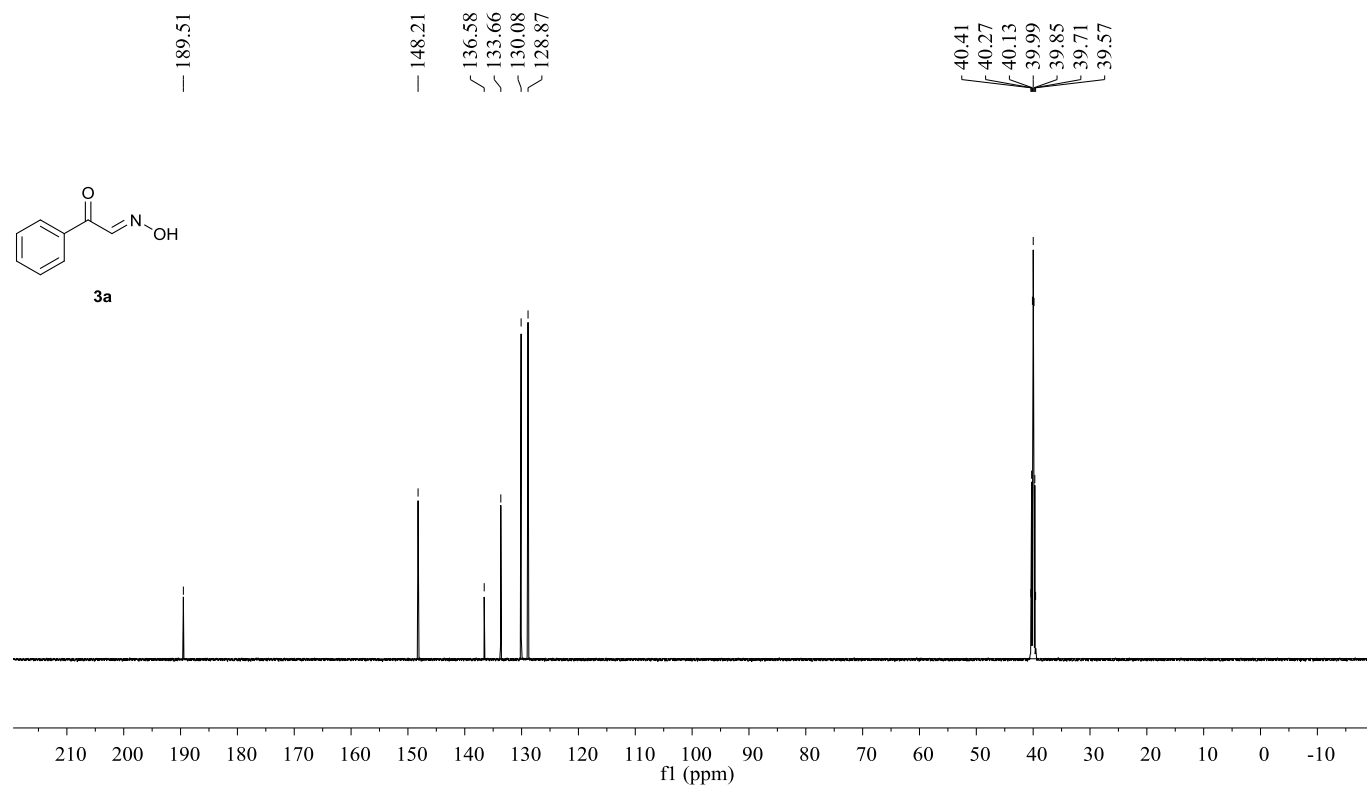

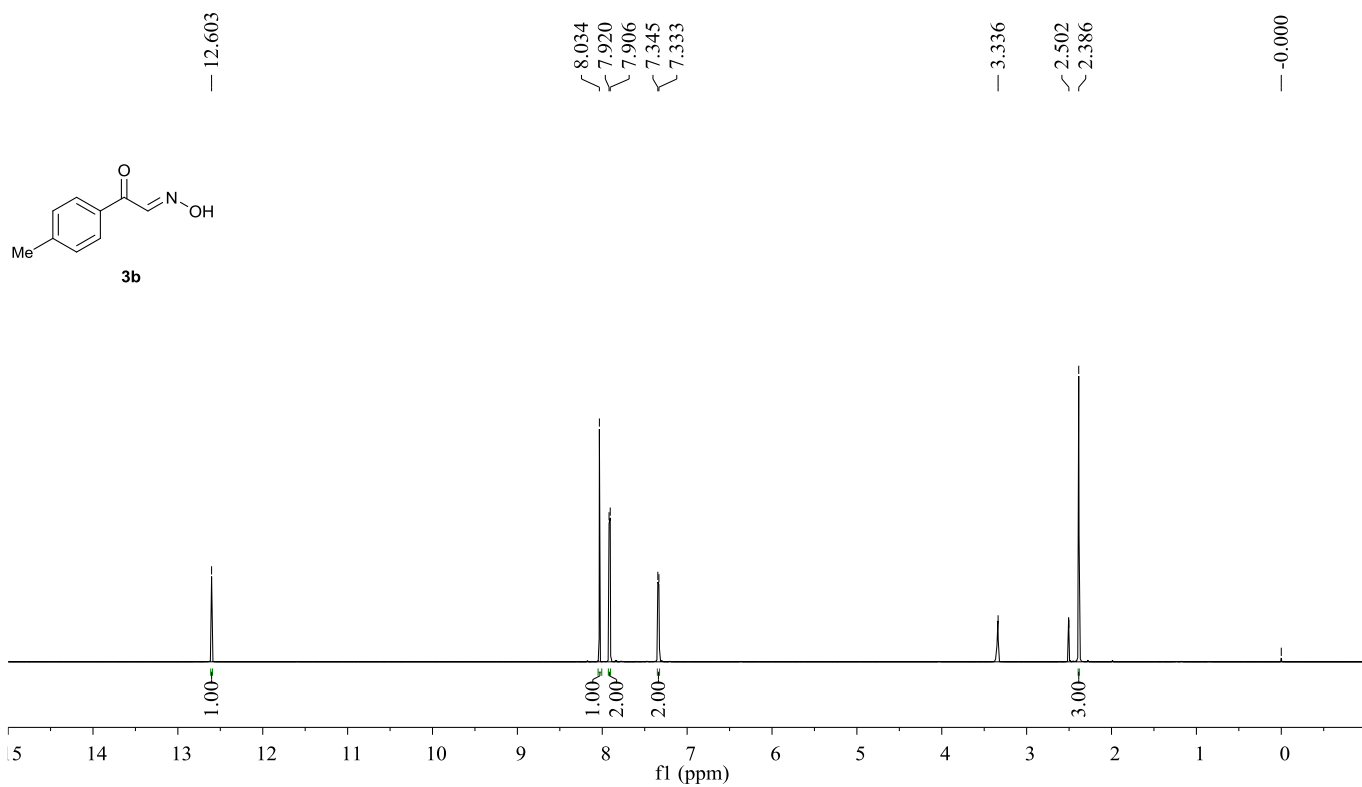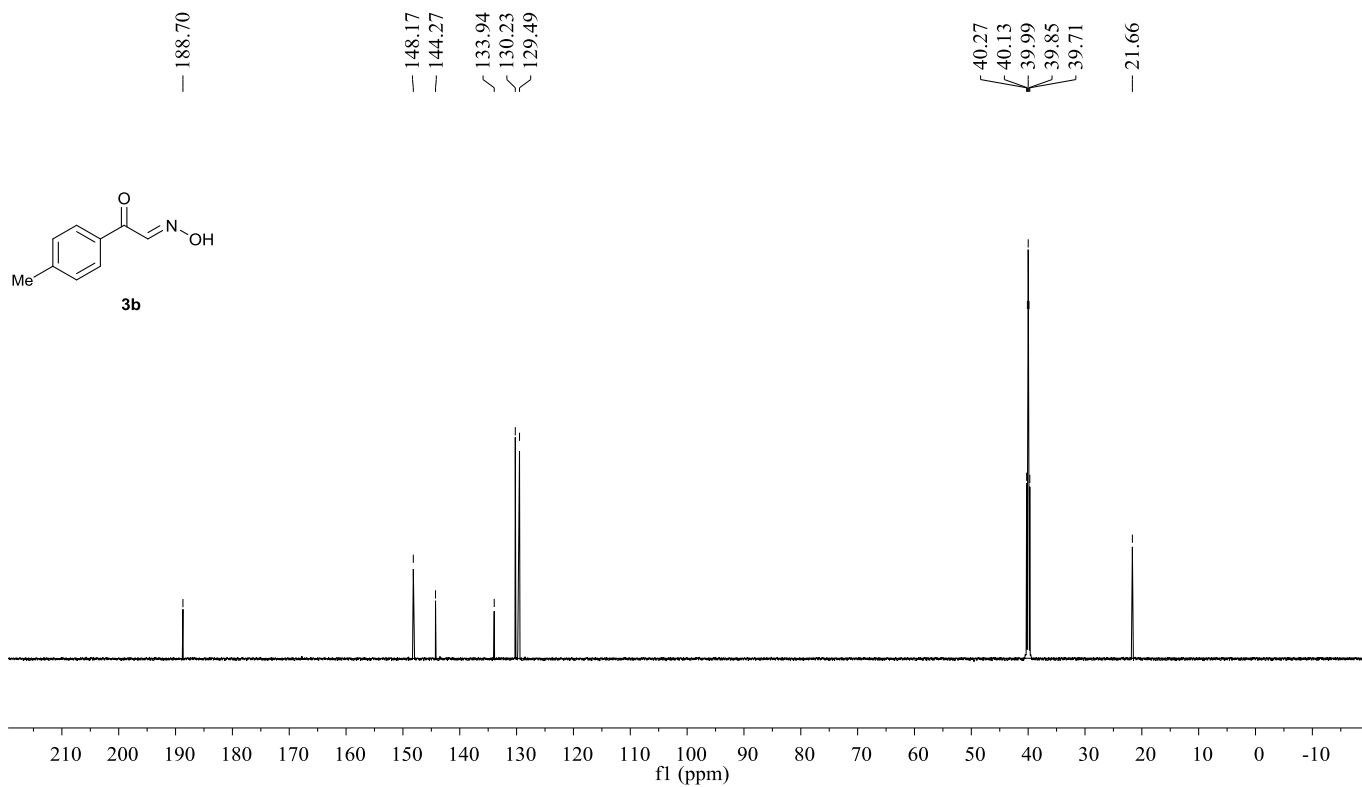

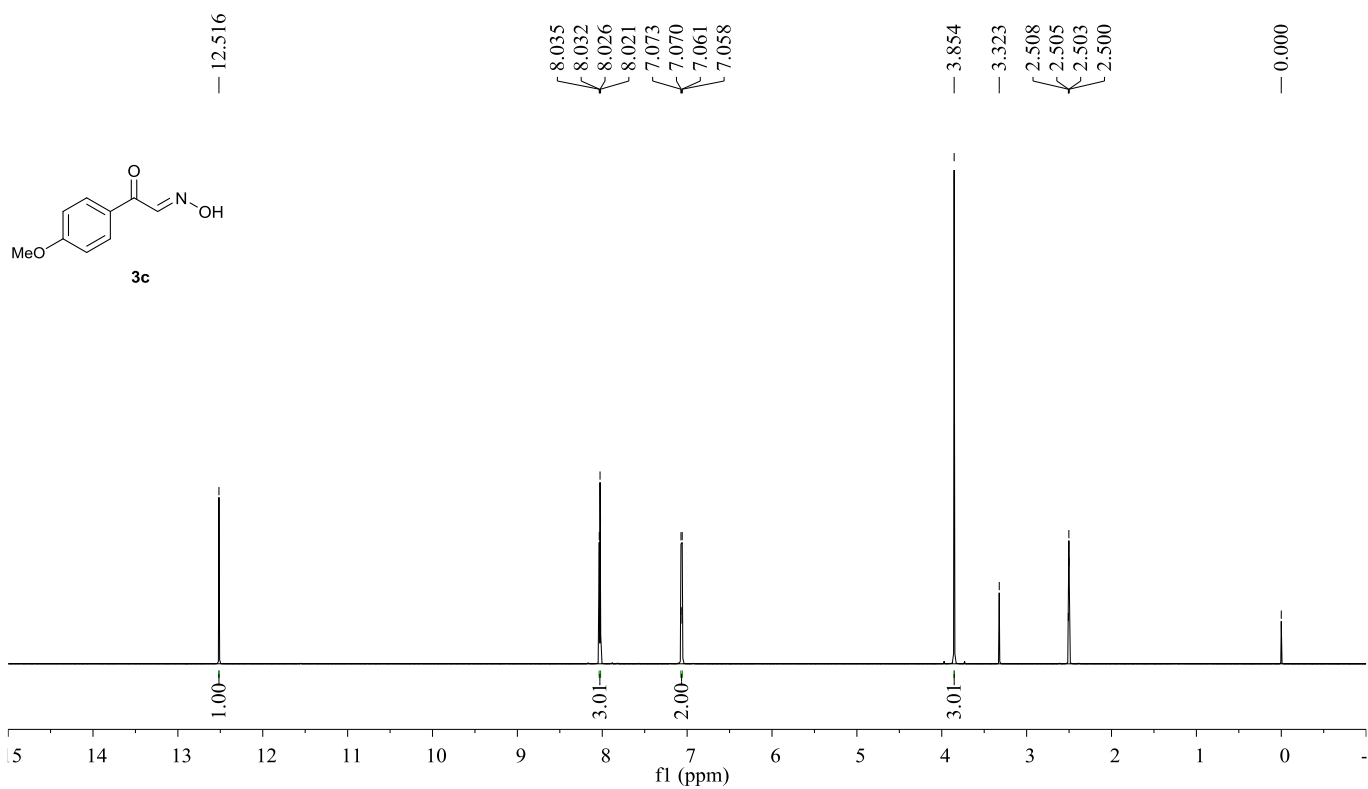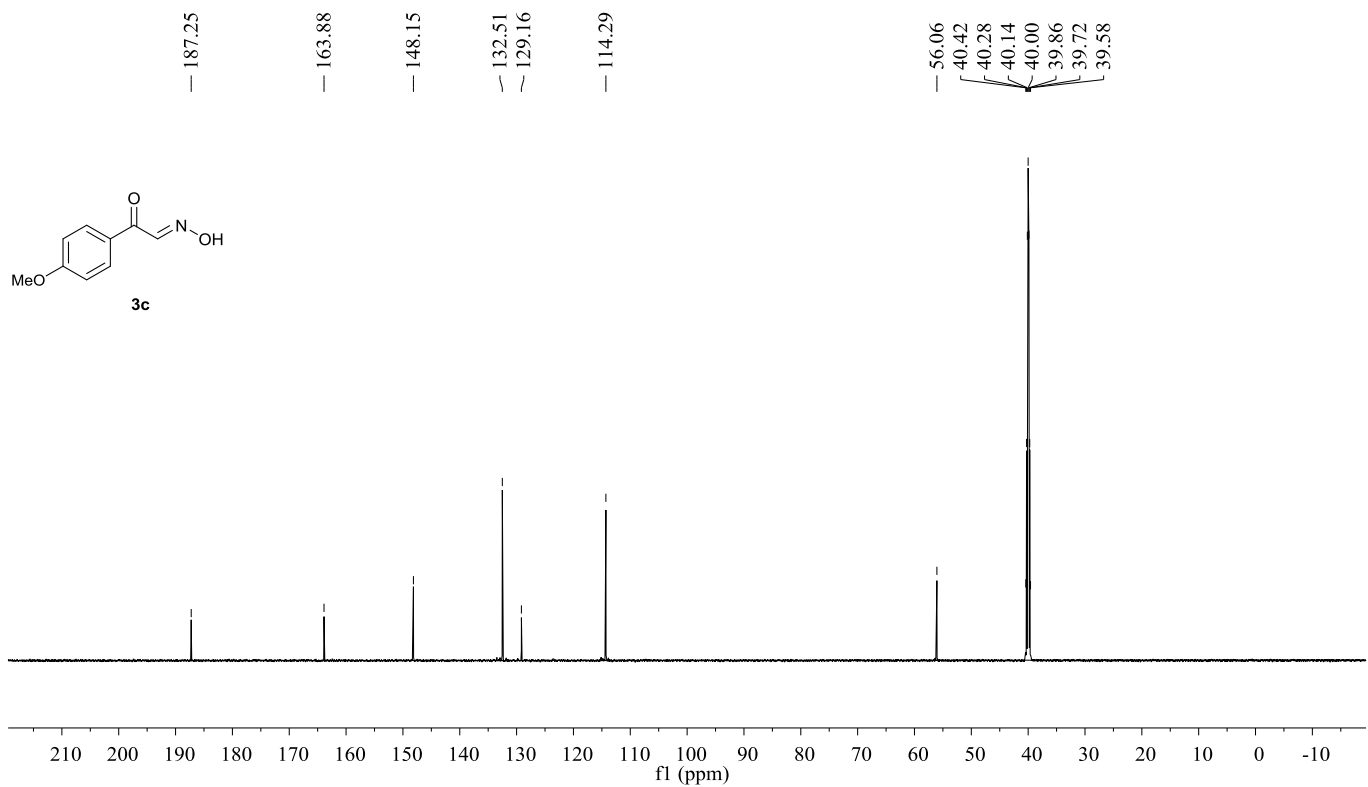

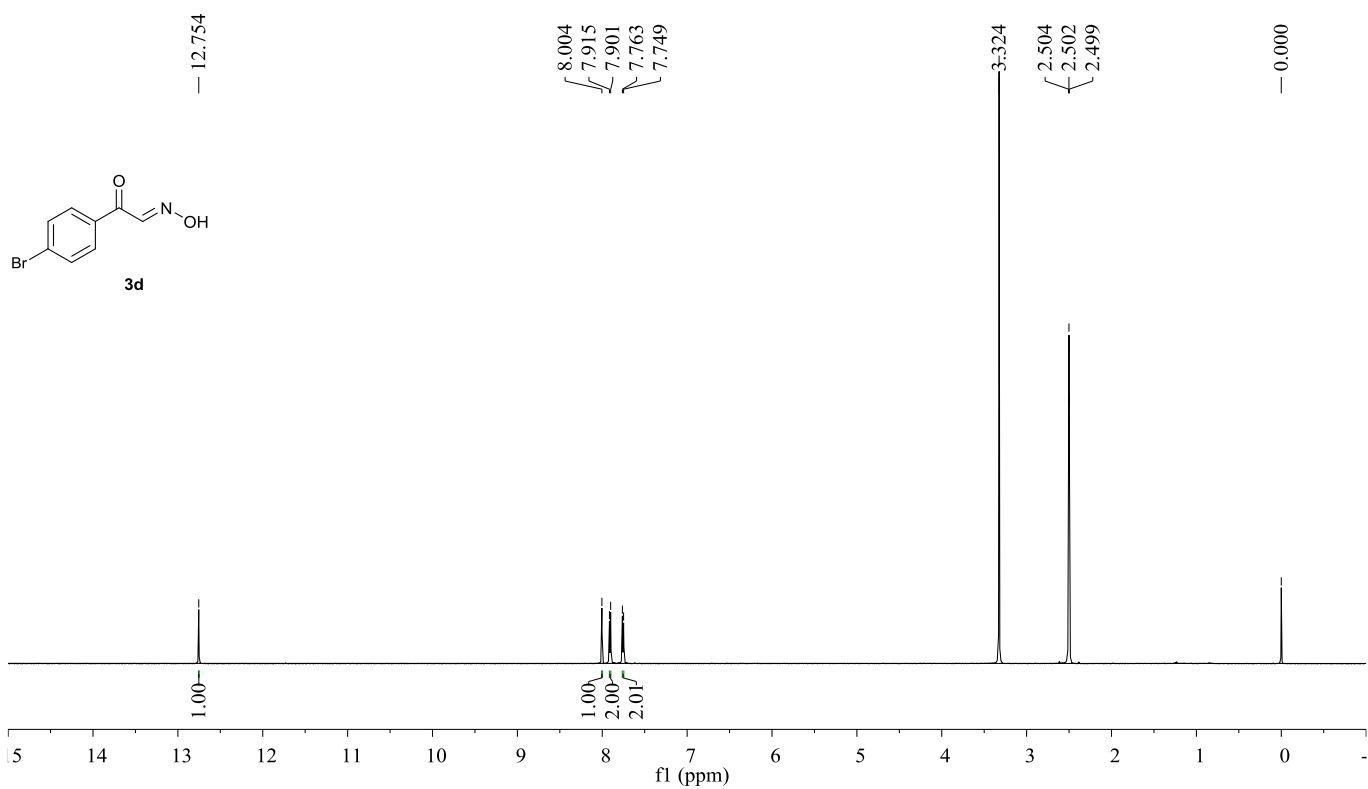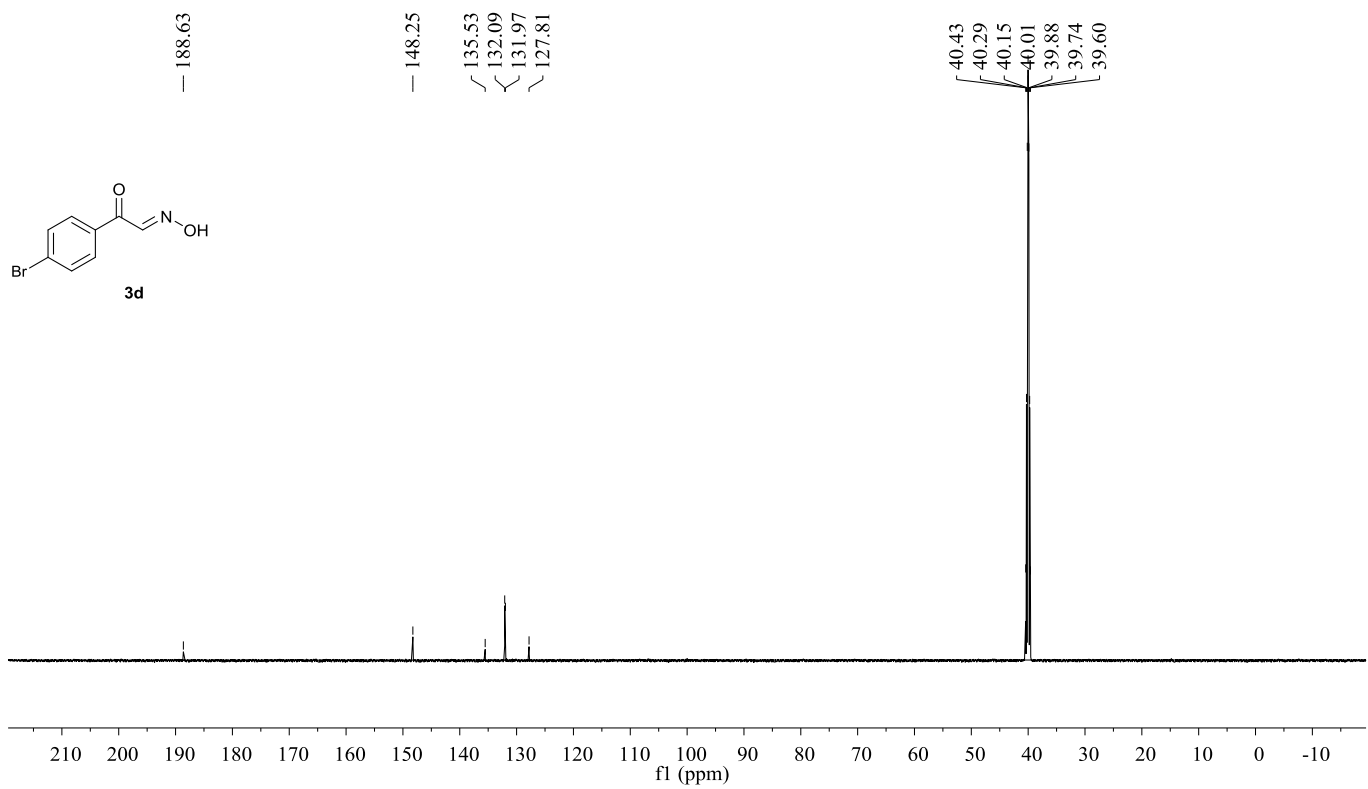

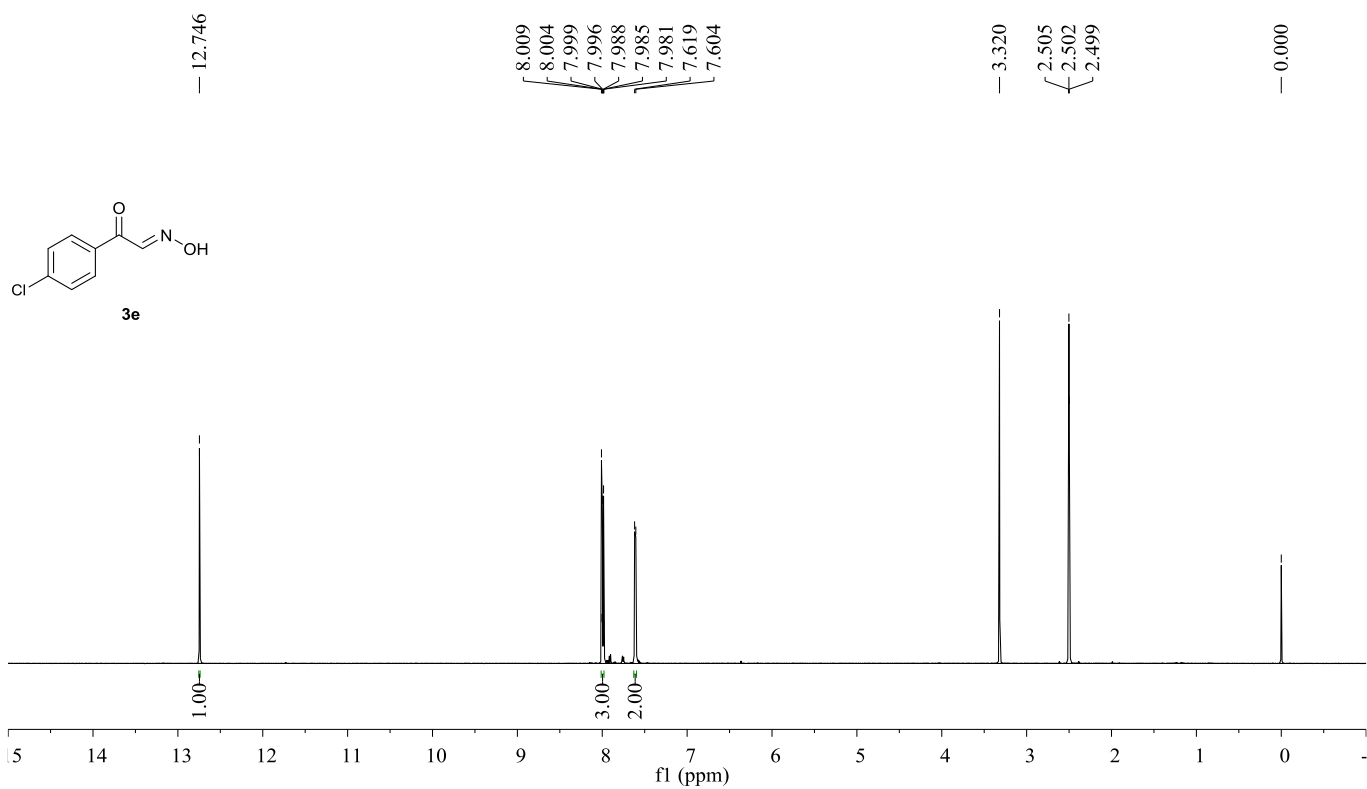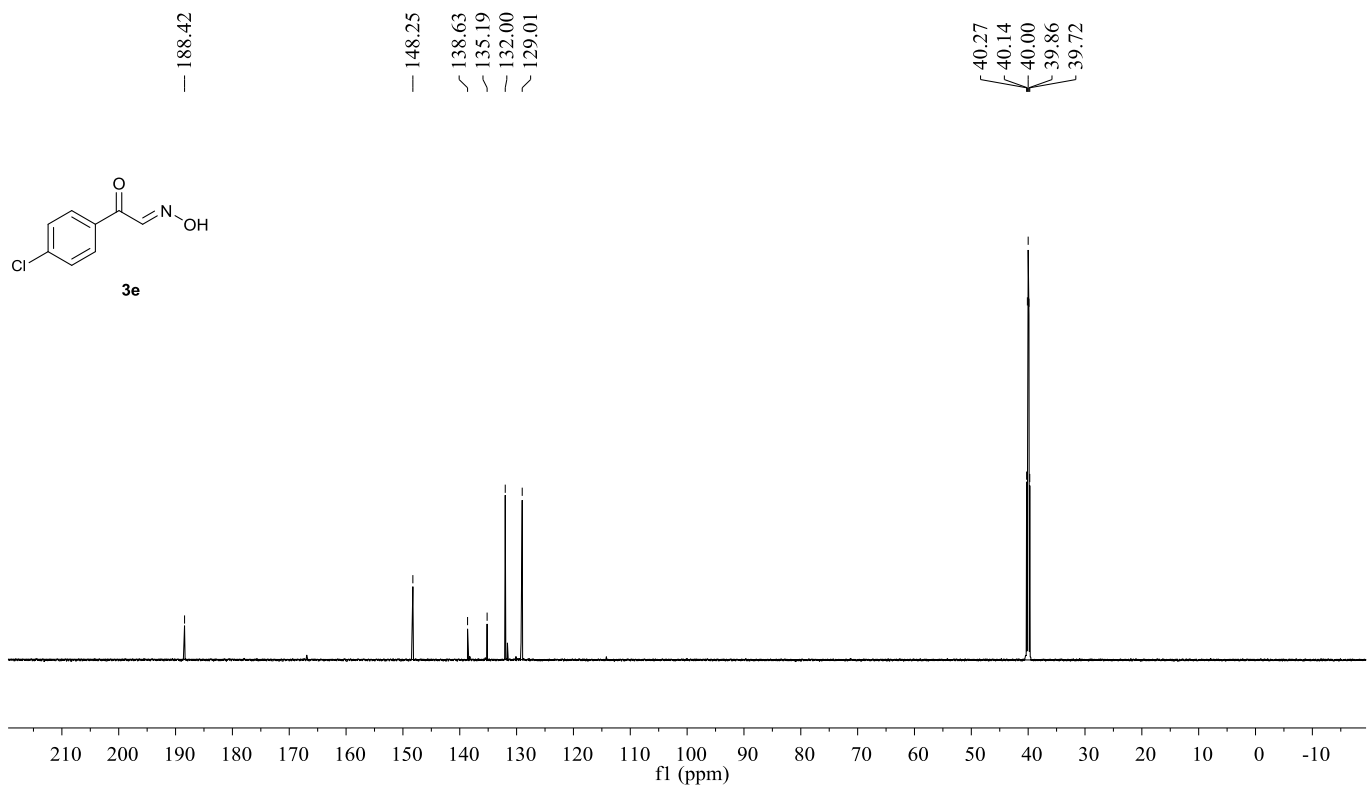

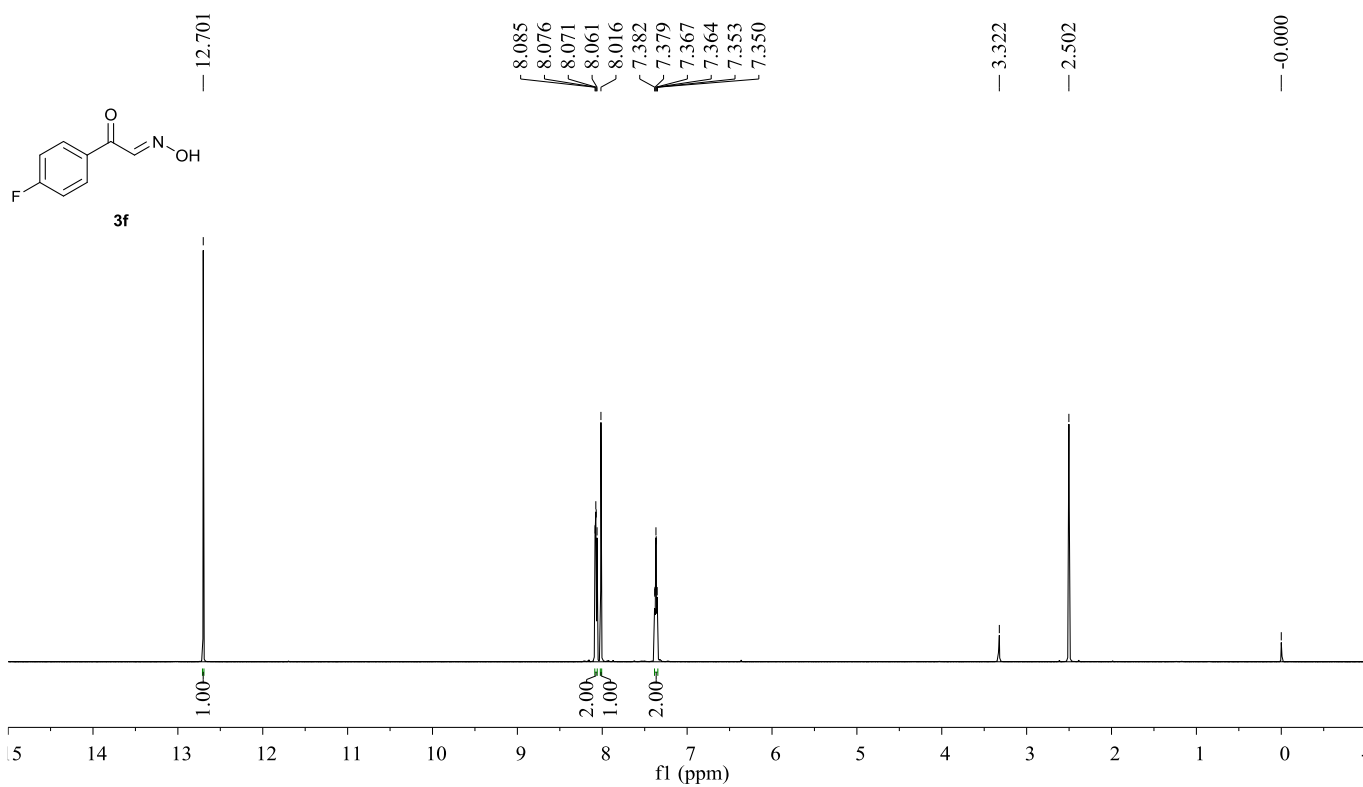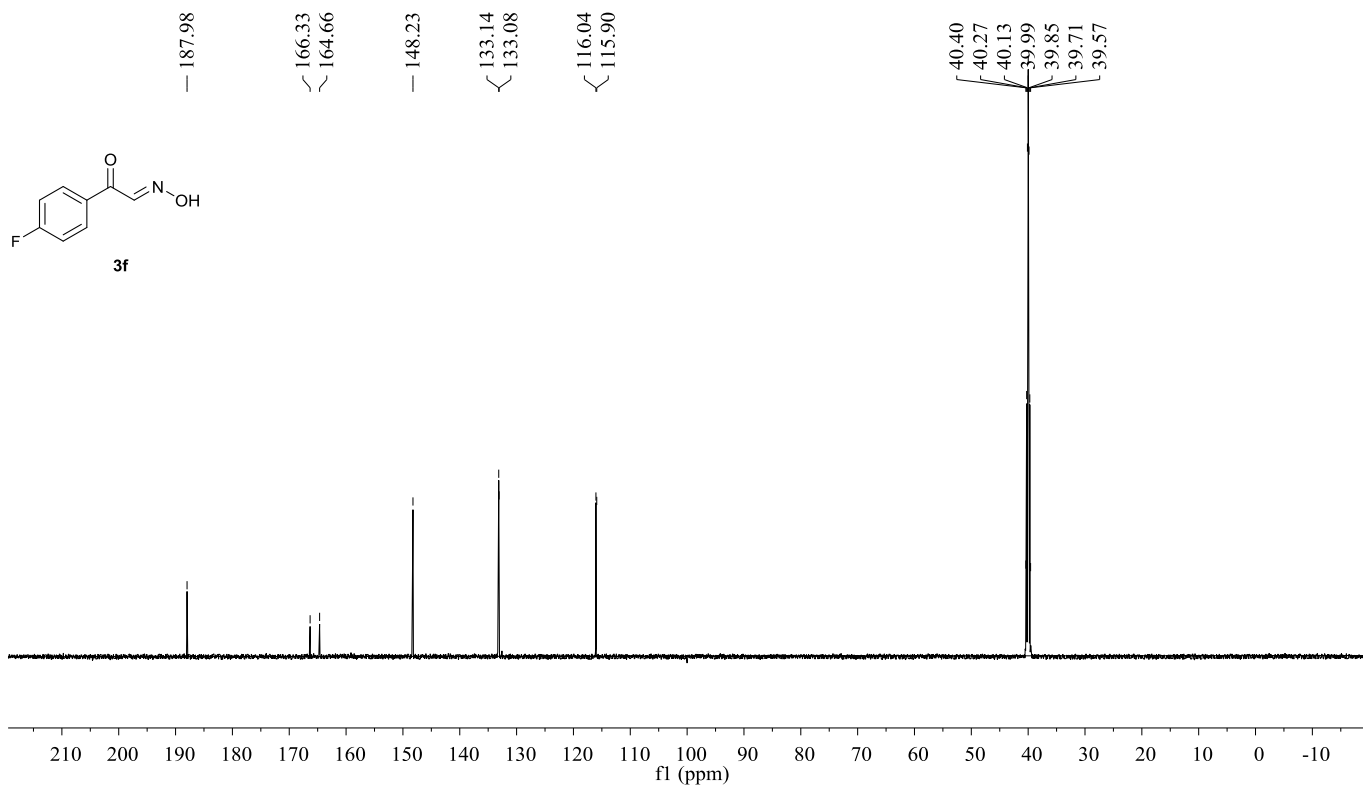

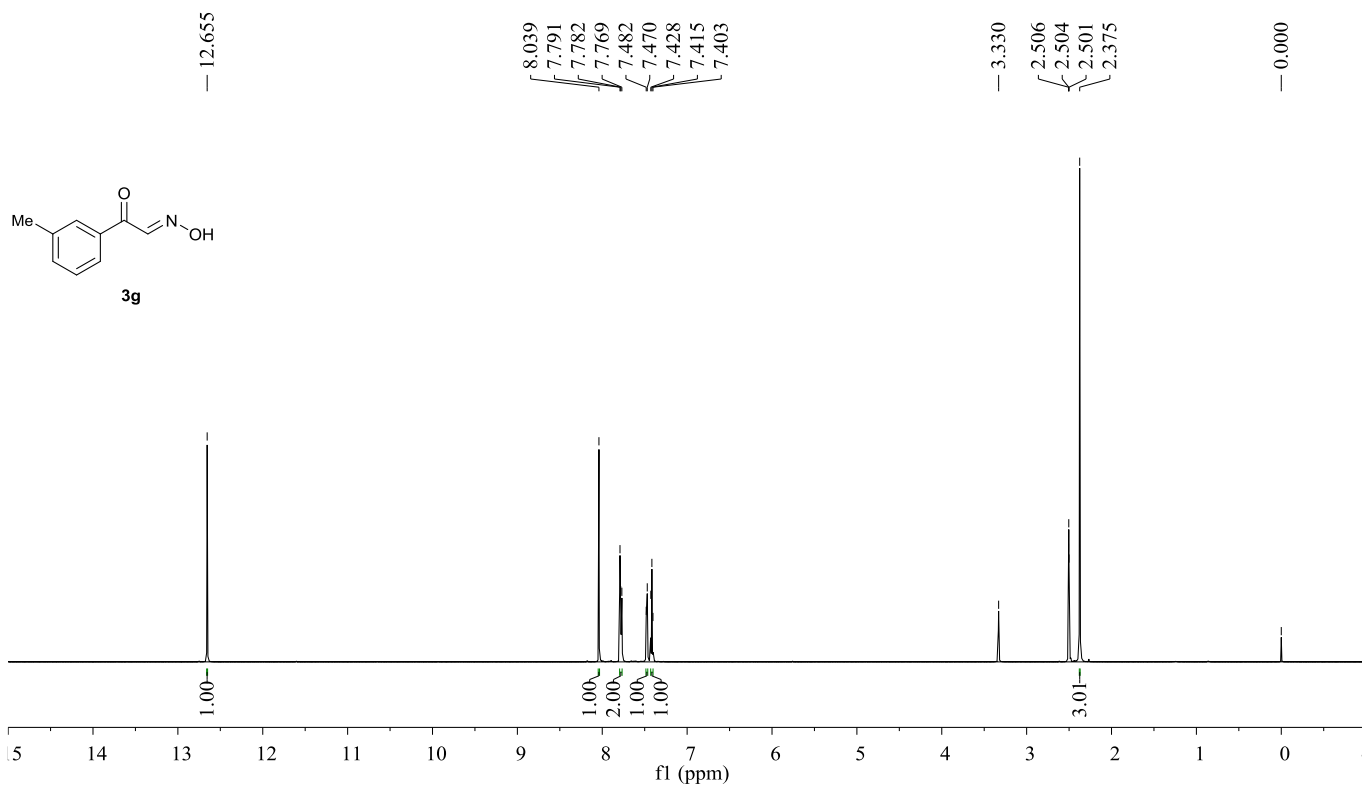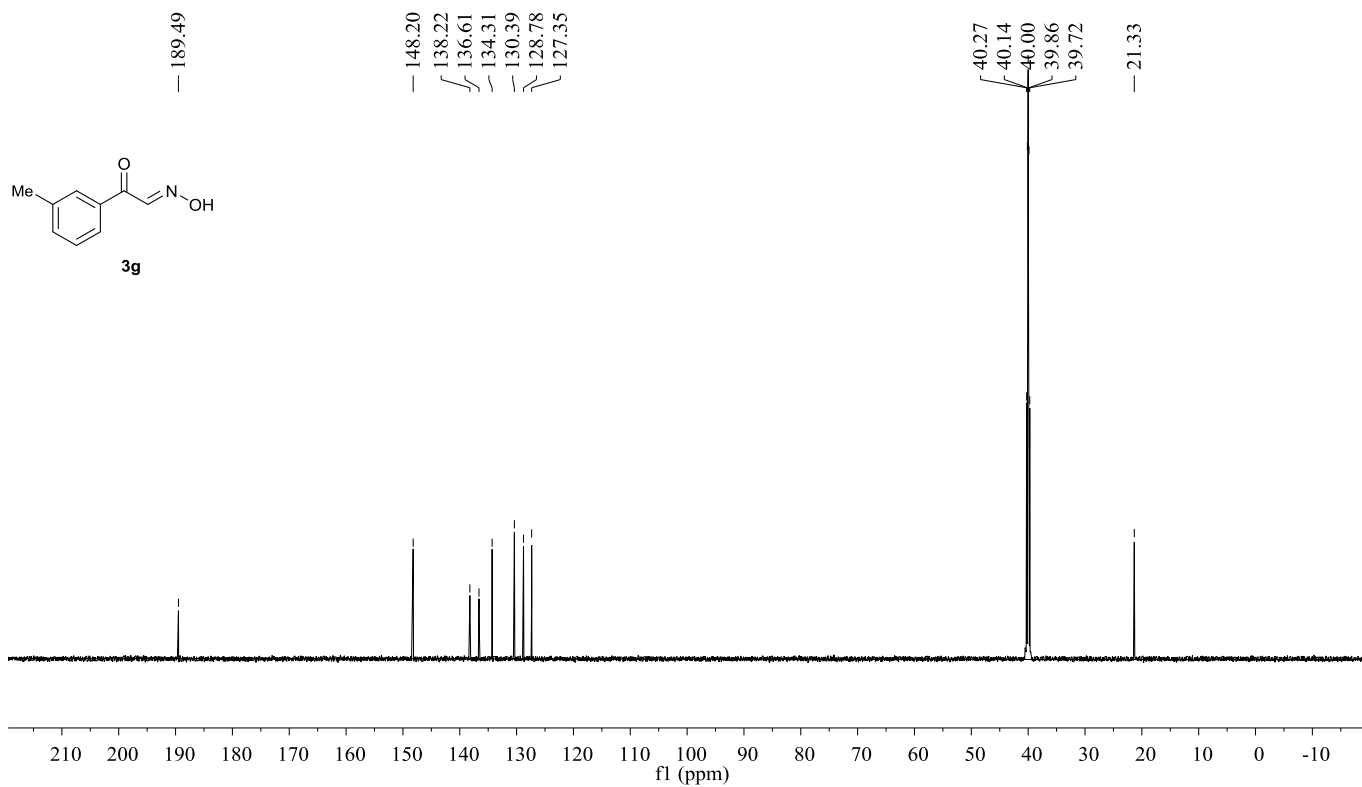



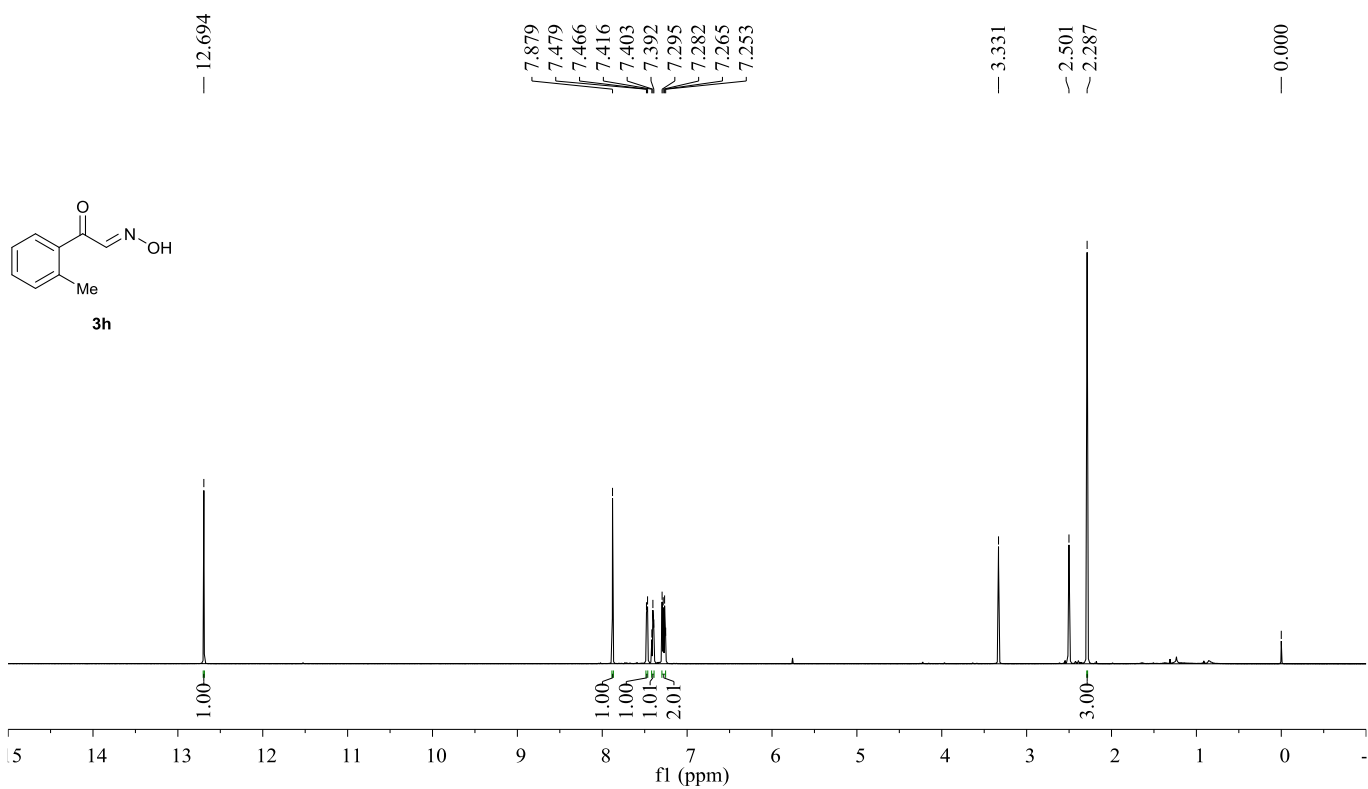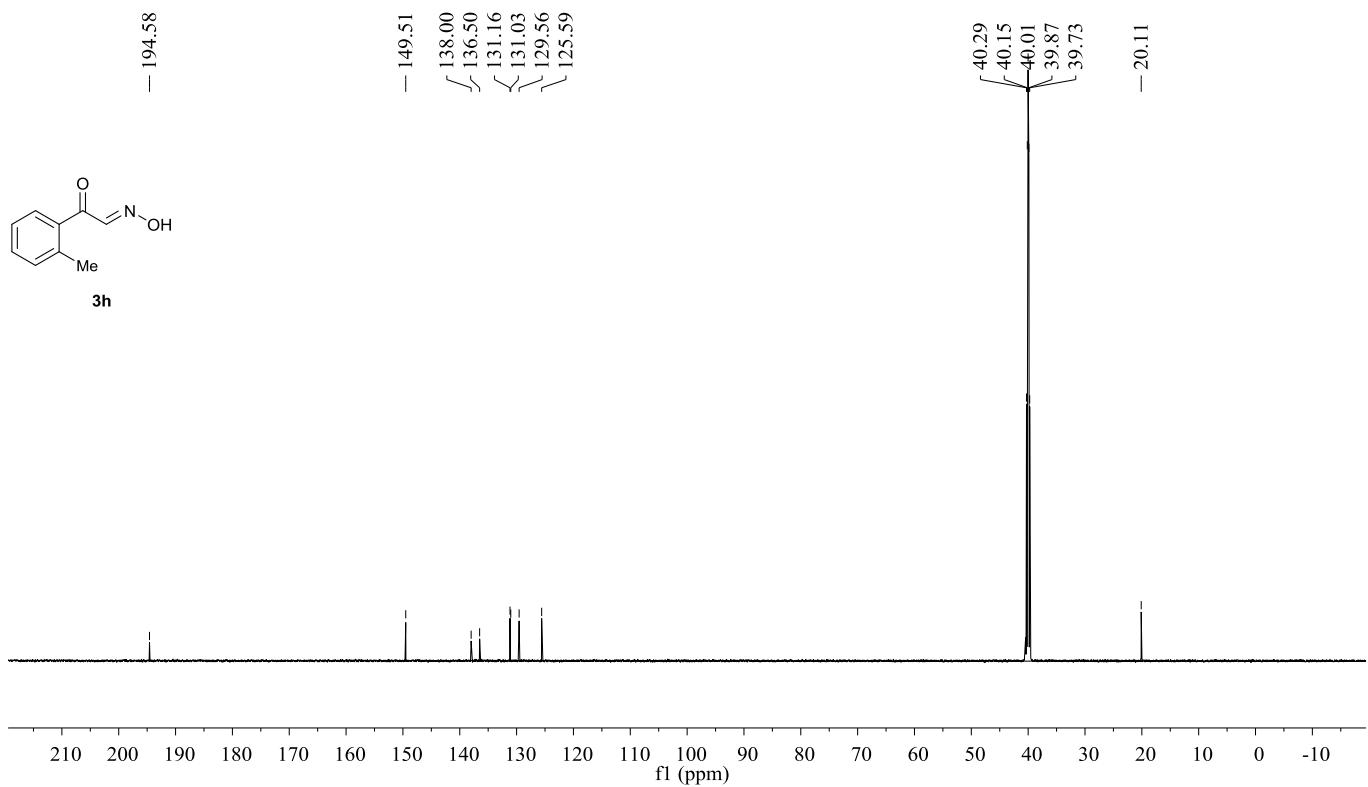

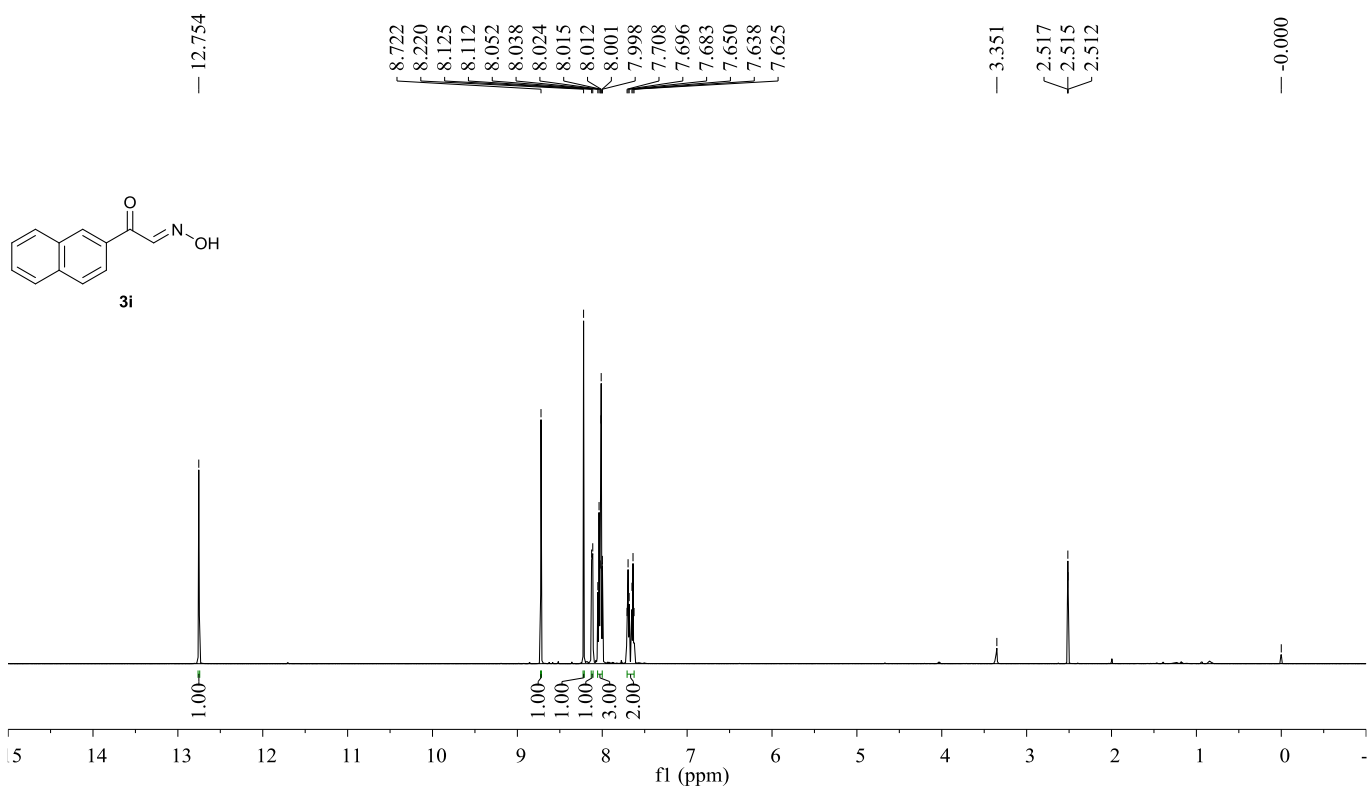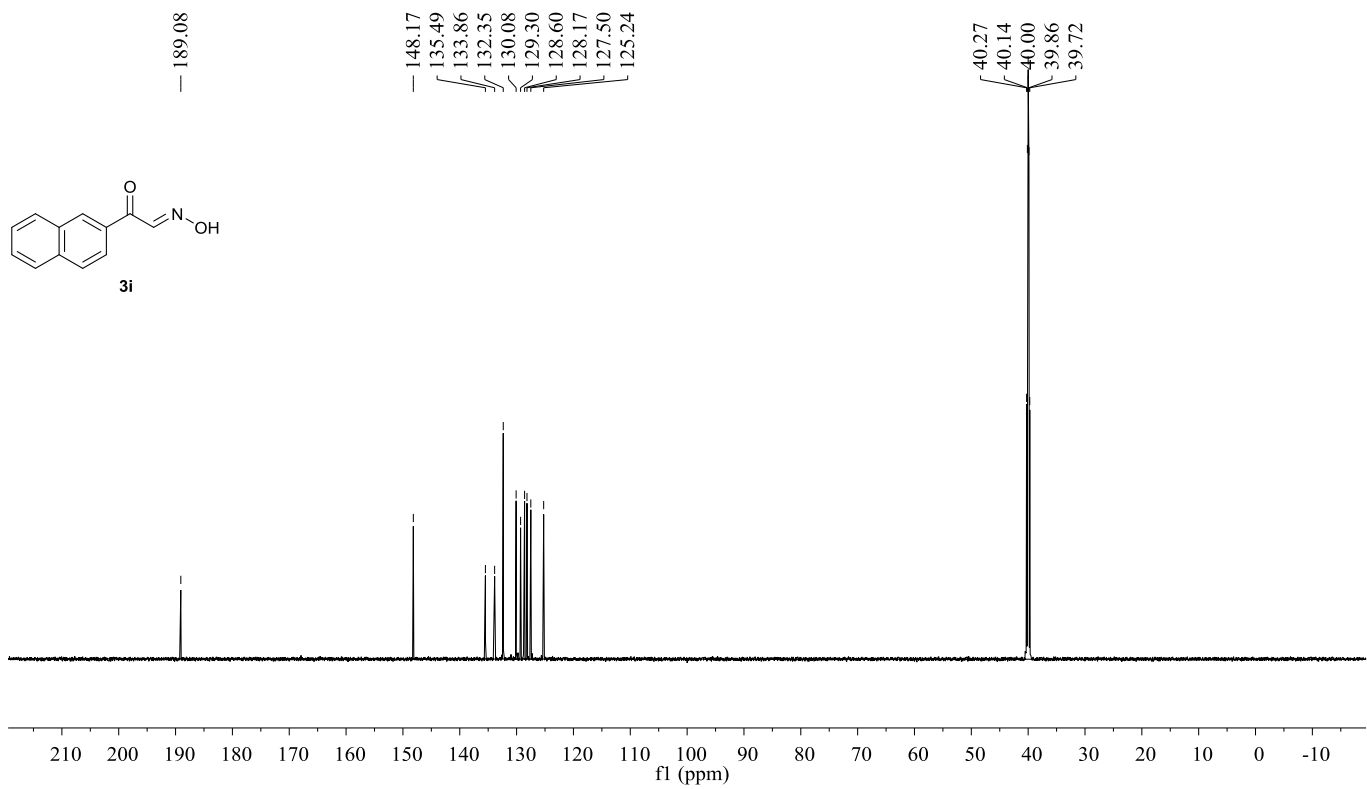

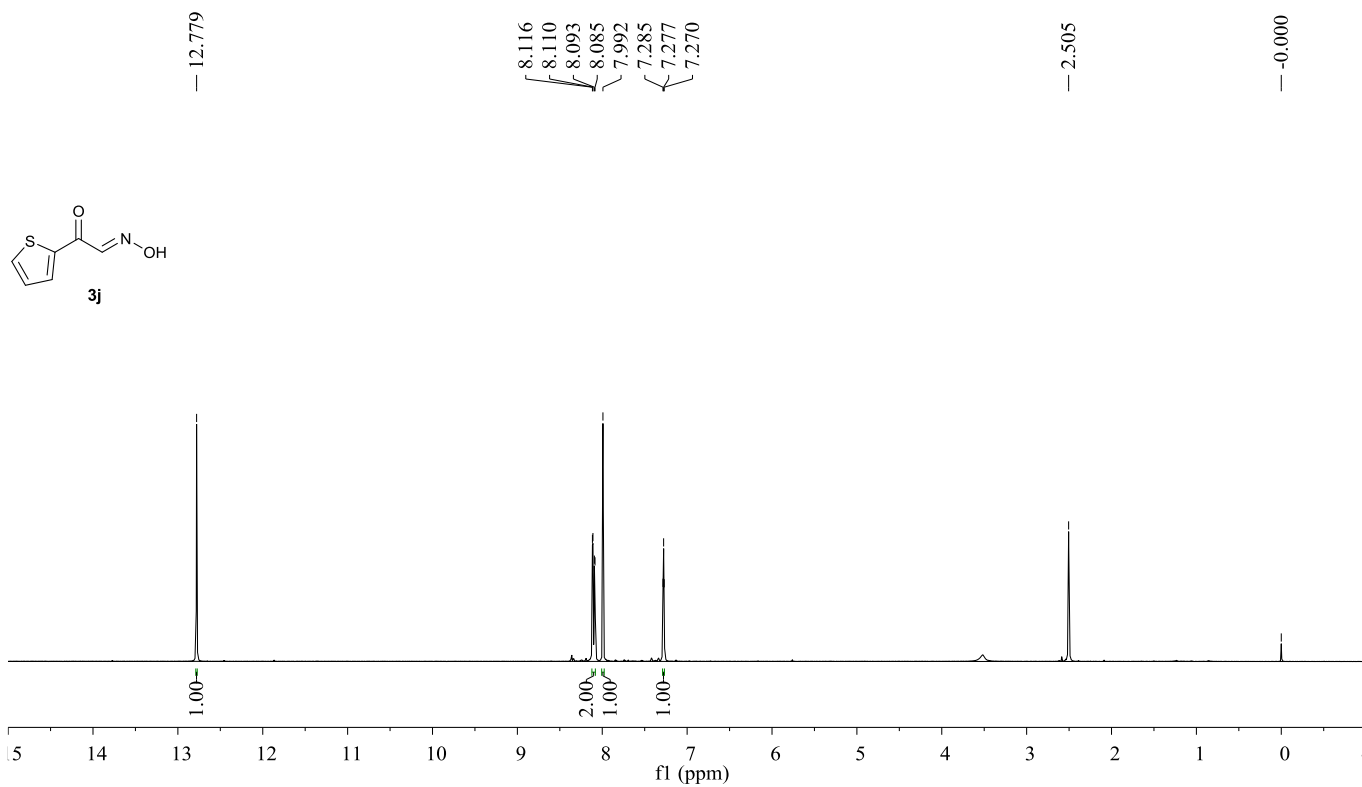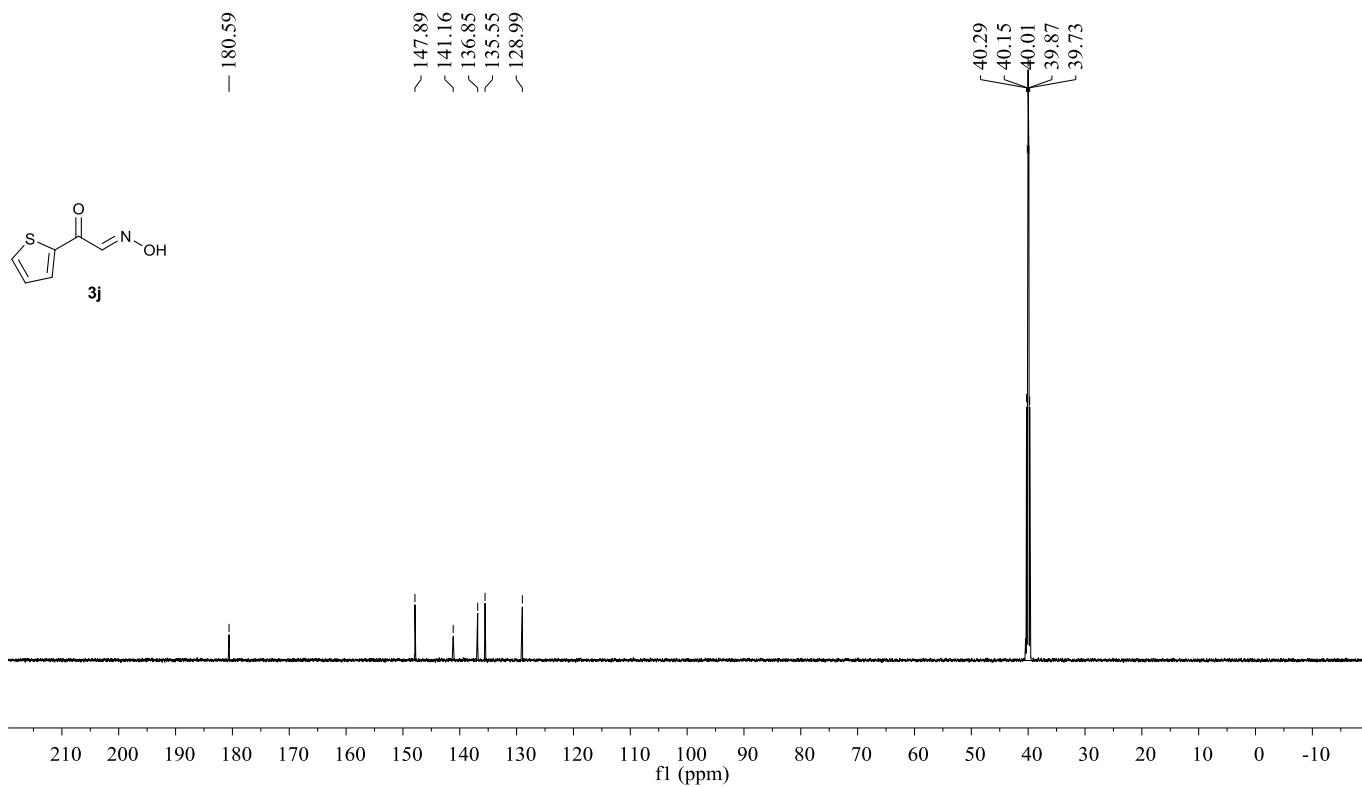

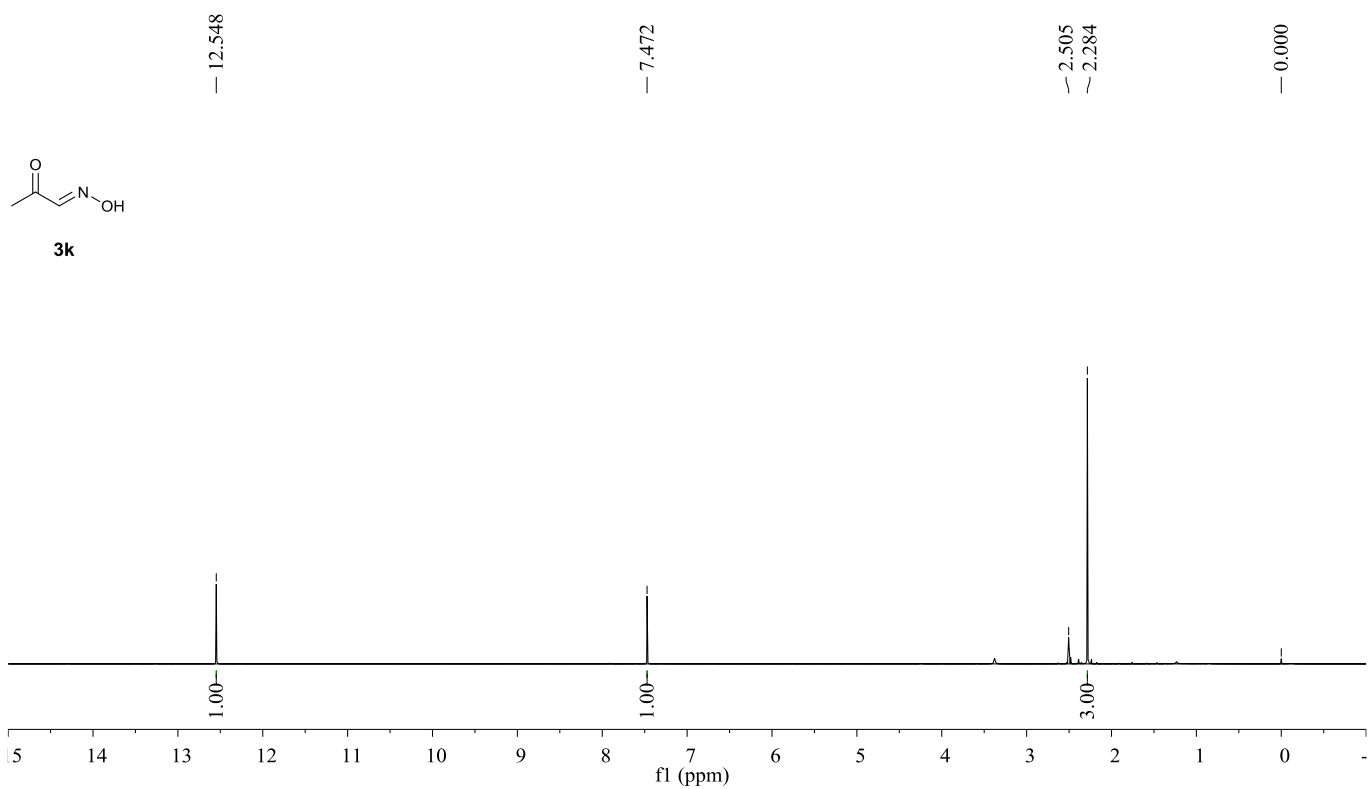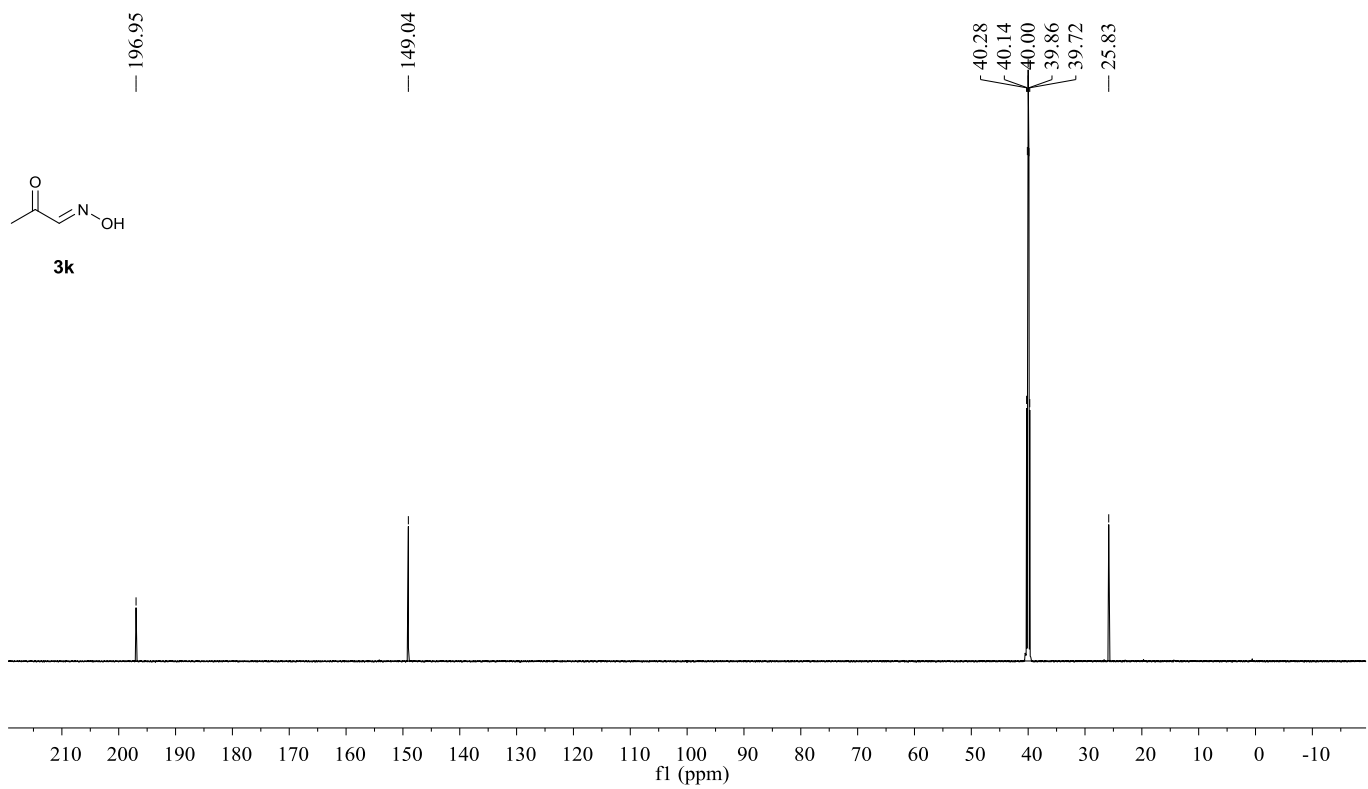

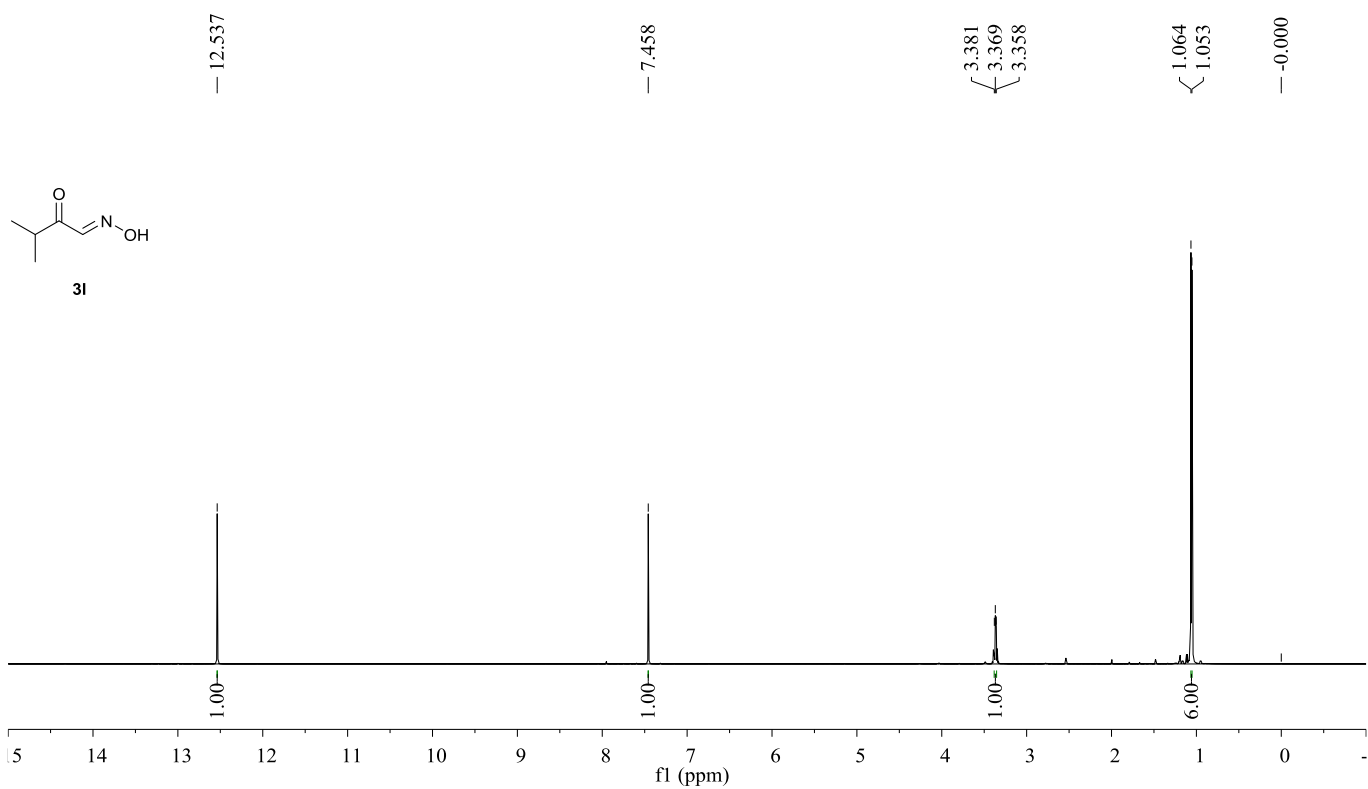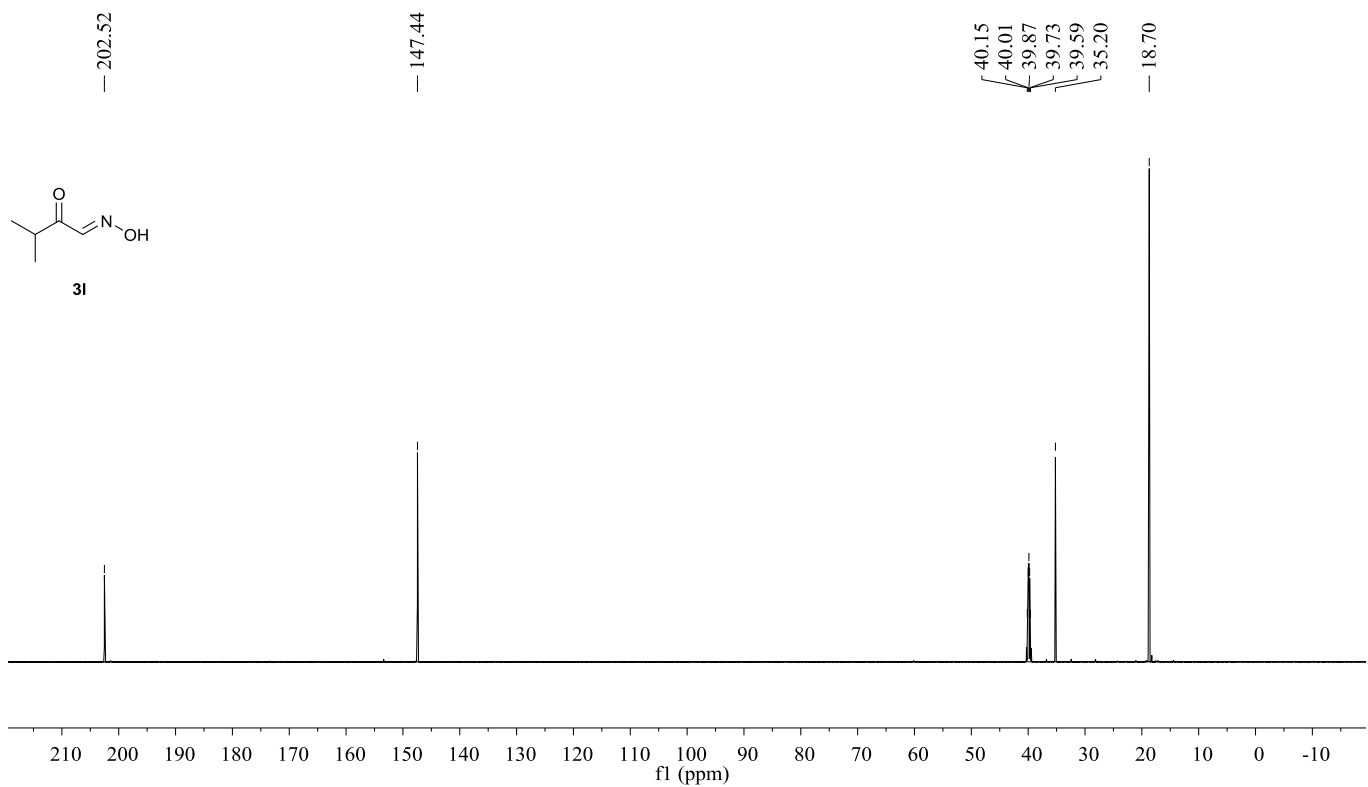

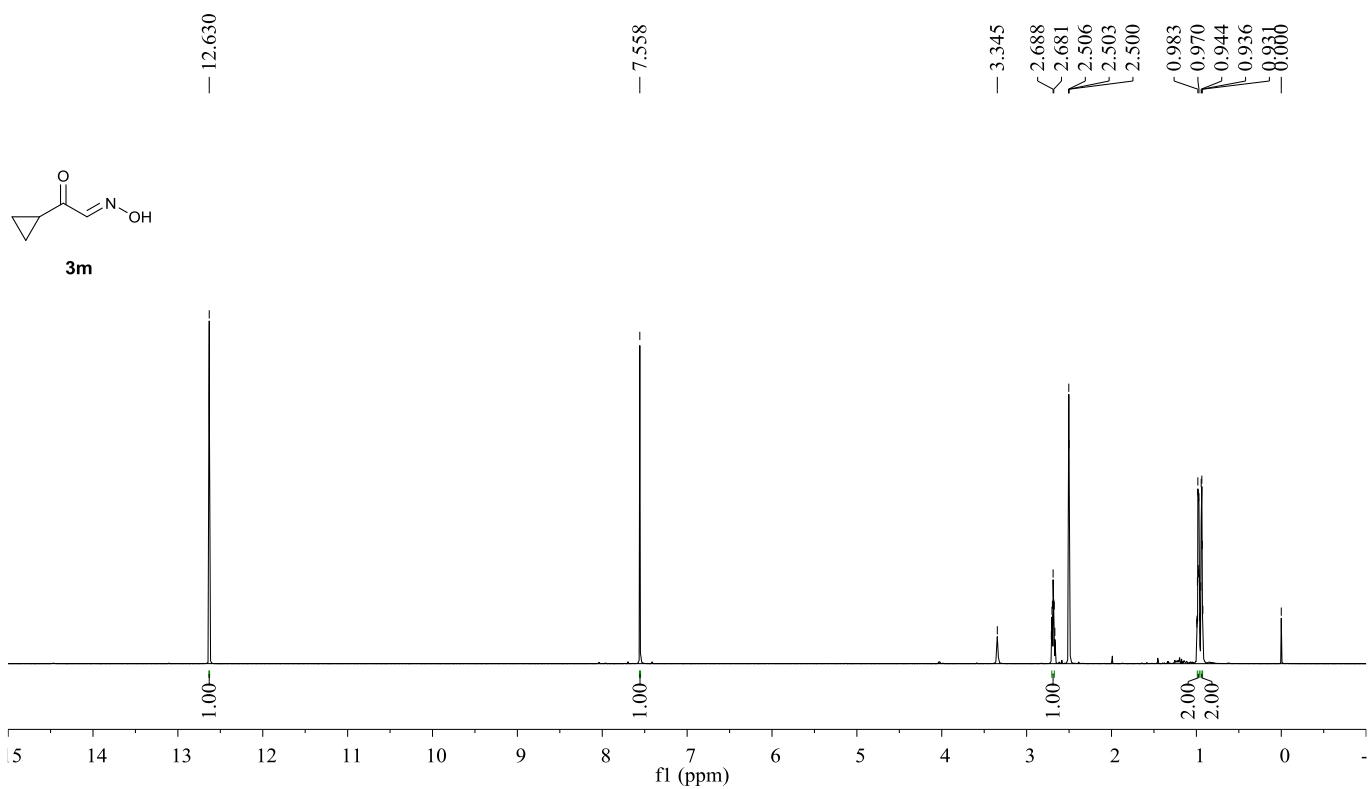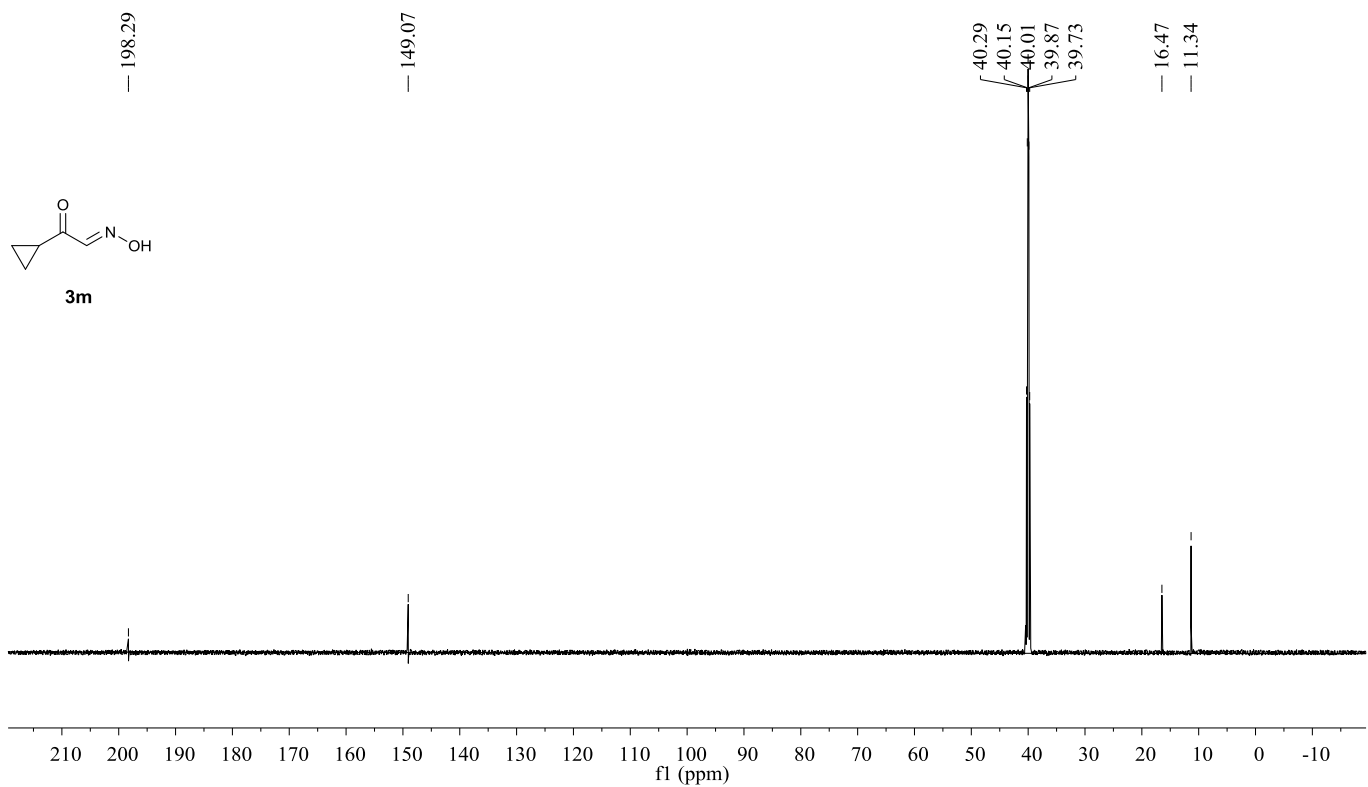

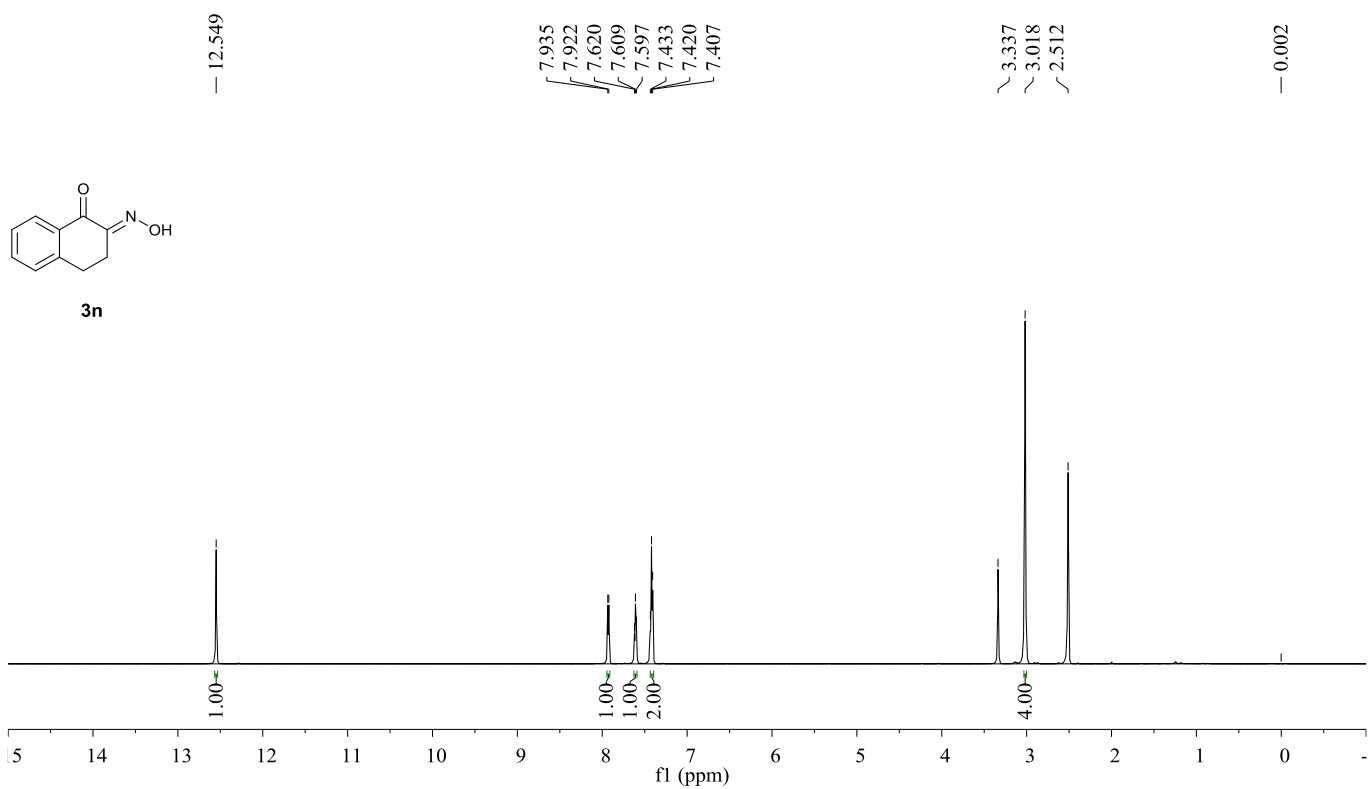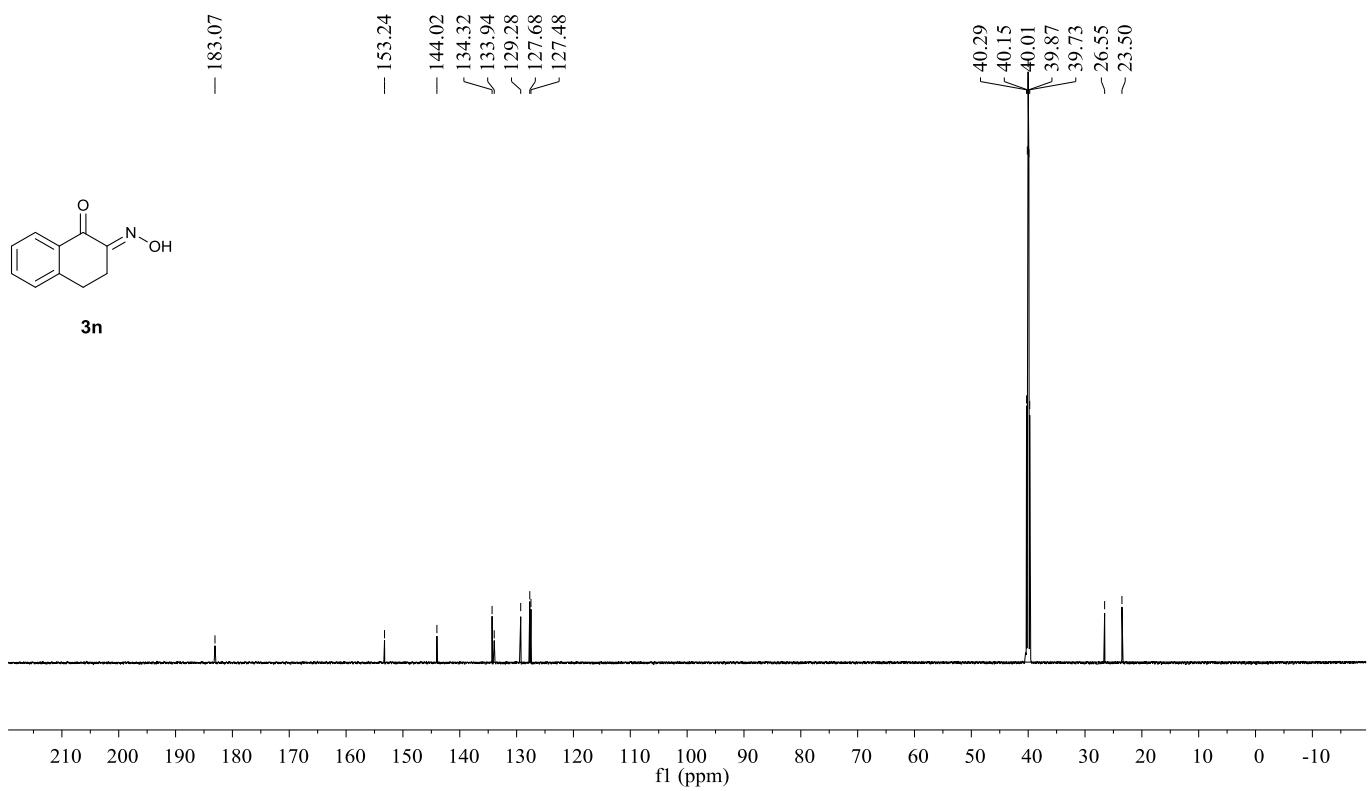

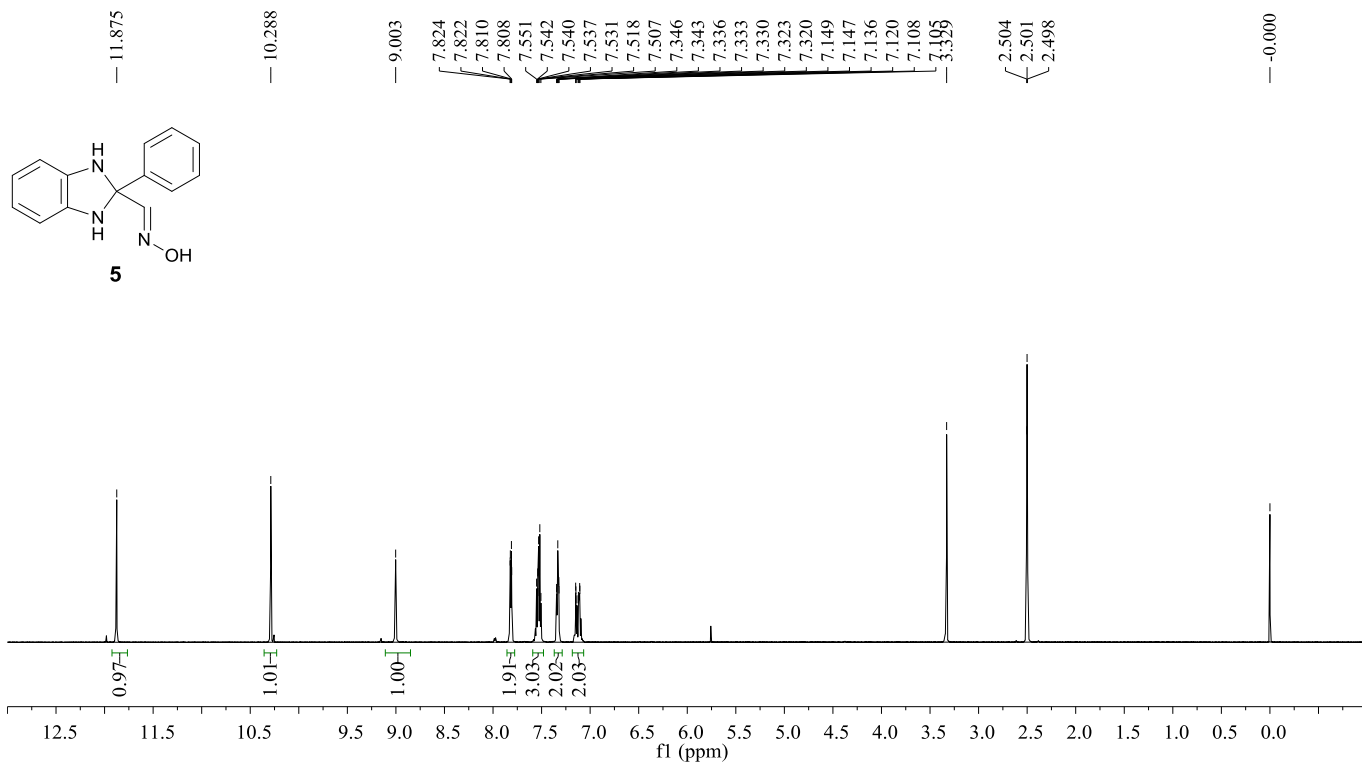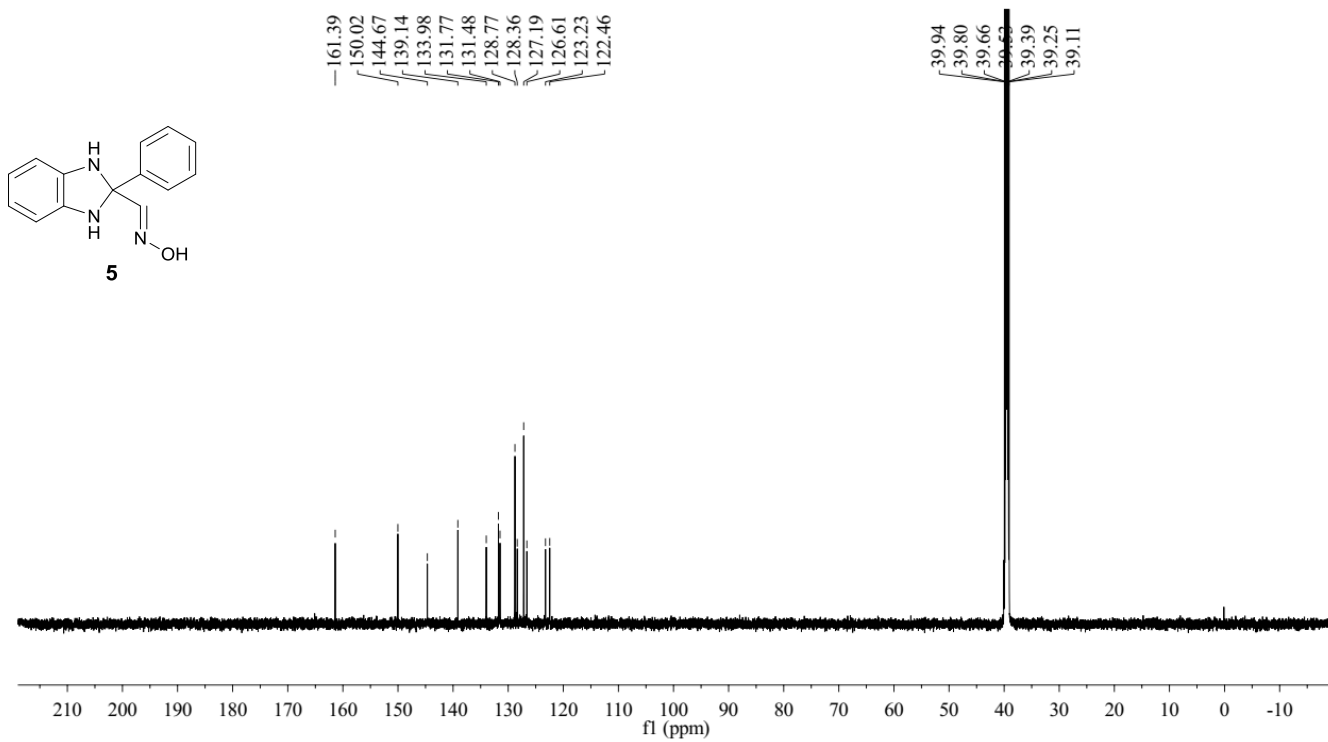



20221007\_L\_1 #46-57 RT: 0.24-0.30 AV: 12 NL: 1.26E6  
T: FTMS + c ESI Full ms [100.0000-750.0000]

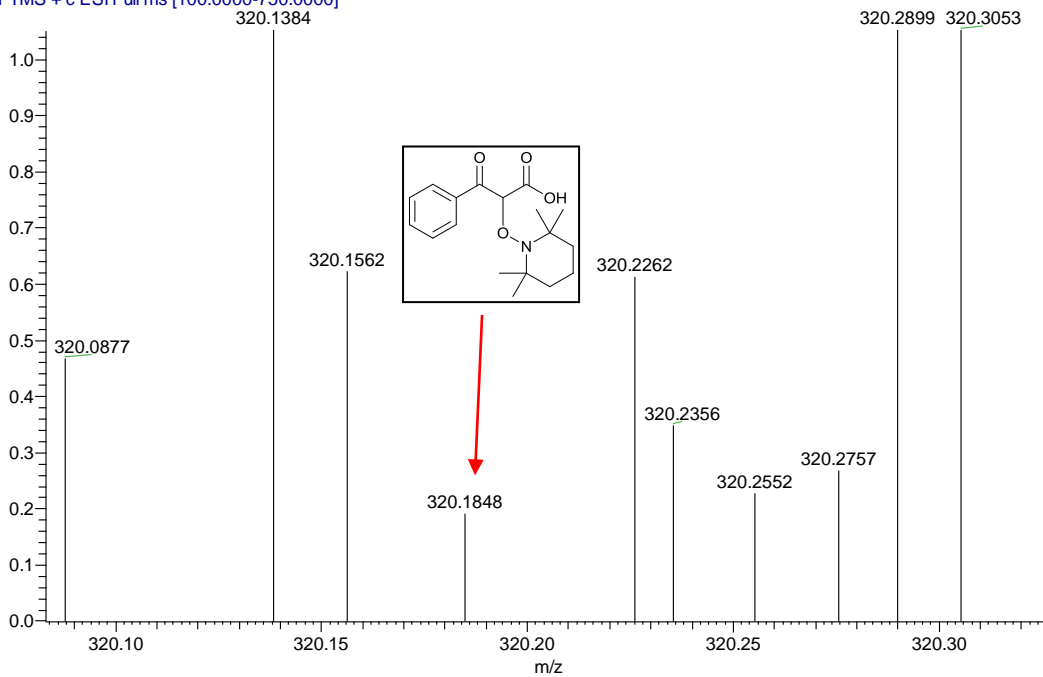

20221007\_L\_1 #105 RT: 0.55 AV: 1 NL: 1.53E5  
T: FTMS + c ESI Full ms [100.0000-750.0000]

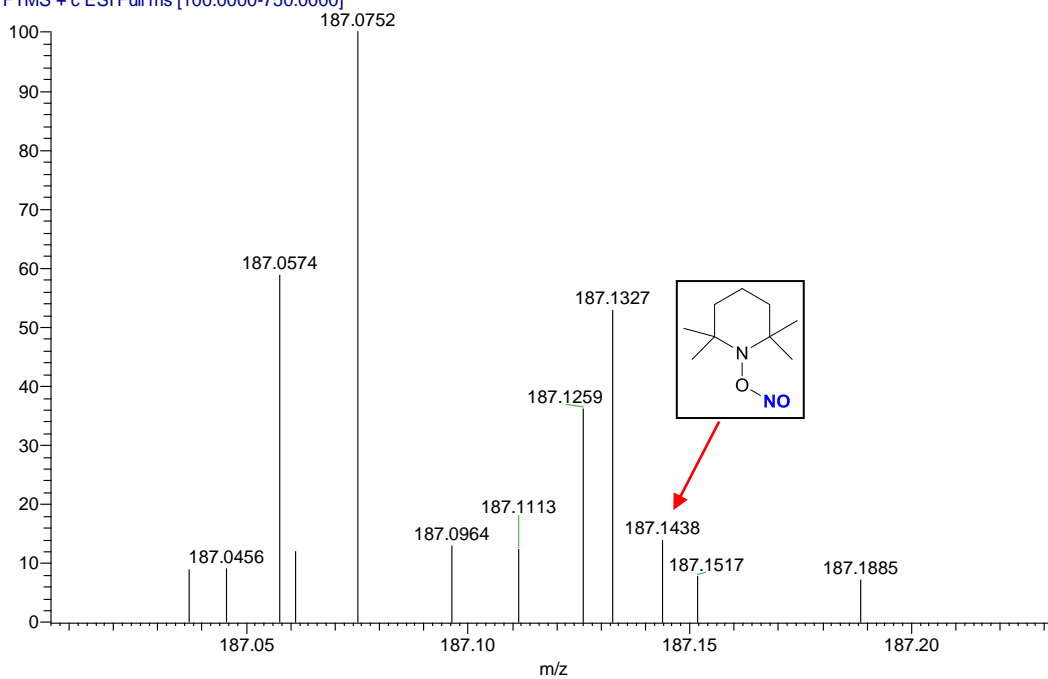

Supplement: d2nj04175h1.pdf [file d2nj04175h1.pdf]
